# Supplementary material for: 2,5-Thiophene substituted spirobisiloles – synthesis, characterization, electrochemical properties and performance in bulk heterojunction solar cells
Source: Royal Society of Chemistry journal article supplement (doi:10.1039/c2nj40535k), 2012-11-07
Supplement: c2nj40535k.pdf [file c2nj40535k.pdf]

## Electronic Supplementary Information

### 2,5-Thiophene Substituted Spiro-bisiloles - Synthesis, Characterization, Electrochemical Properties and Performance in Bulk Heterojunction Solar Cells

Kassem Amro, Anil K. Thakur, Joëlle Rault-Berthelot, Cyril Poriel, Lionel Hirsch, William E. Douglas, Sébastien Clément and Philippe Gerbier

| Contents                                                                                                                                                          | Page |
|-------------------------------------------------------------------------------------------------------------------------------------------------------------------|------|
| <b>Figure S1:</b> $^1\text{H}$ NMR spectrum of <b>DTSBS</b> in $\text{CDCl}_3$                                                                                    | S3   |
| <b>Figure S2:</b> $^{29}\text{Si}\{^1\text{H}\}$ NMR spectrum of <b>DTSBS</b> in $\text{CDCl}_3$                                                                  | S4   |
| <b>Figure S3:</b> $^1\text{H}$ NMR spectrum of <b>BBTSBS</b> in $\text{CDCl}_3$                                                                                   | S4   |
| <b>Figure S4:</b> $^{29}\text{Si}\{^1\text{H}\}$ NMR spectrum of <b>BBTSBS</b> in $\text{CDCl}_3$                                                                 | S5   |
| <b>Figure S5:</b> TGA trace for <b>DTSBS</b>                                                                                                                      | S5   |
| <b>Figure S6:</b> TGA trace for <b>BBTSBS</b>                                                                                                                     | S6   |
| <b>Figure S7:</b> Absorption spectra of <b>DTSBS</b> and <b>BBTSBS</b> in thin film                                                                               | S6   |
| <b>Figure S8:</b> Excitation and emission spectra in the solid state of <b>DTSBS</b> and <b>BBTSBS</b> .                                                          | S7   |
| <b>Figure S9.</b> Structure of the siloles and spiro-siloles studied herein.                                                                                      | S8   |
| <b>Figure S10.</b> Kohn-Sham frontier orbitals and corresponding energies of the siloles and spiro-siloles.                                                       | S9   |
| <b>Figure S11.</b> Illustration of the HOMO-HOMO interaction of two spiro-linked silole rings exhibiting spiroconjugation.                                        | S10  |
| <b>Figure S12.</b> HOMO-1 Kohn-Sham orbital of <b>OPSBS</b> showing the overlap of the two $\pi$ orbitals on the silole moieties giving rise to spiroconjugation. | S10  |
| <b>Figure S13.</b> Views of Kohn-Sham HOMO-1 and HOMO of <b>DTSBS</b> and <b>BBTSBS</b> .                                                                         | S11  |

|                                                                                                                                                                                                                 |     |
|-----------------------------------------------------------------------------------------------------------------------------------------------------------------------------------------------------------------|-----|
| <b>Figure S14.</b> Views of Kohn-Sham LUMO and LUMO+1 of <b>DTSBS</b> and <b>BBTSBS</b> .<br>The arrows indicate the location of the $\sigma^*$ orbitals involved in the $\sigma^*$ - $\pi^*$ hyperconjugation. | S12 |
| <b>Figure S15:</b> Experimental DPV recorded in $\text{CH}_2\text{Cl}_2$ - $[\text{NBu}_4][\text{PF}_6]$ in the presence of <b>DTSBS</b> and <b>BBTSBS</b>                                                      | S13 |
| <b>Figure S16:</b> Cyclic voltammetry in $\text{CH}_2\text{Cl}_2$ - $[\text{NBu}_4][\text{PF}_6]$ 0.2 M. in the presence of <b>DTSBS</b> and of <b>BBTSBS</b> .                                                 | S14 |
| <b>Figure S17:</b> Cyclic voltammetry in $\text{CH}_2\text{Cl}_2$ - $[\text{NBu}_4][\text{PF}_6]$ 0.2 M of <b>poly(BBTSBS)</b> and of <b>poly(DTSBS)</b> deposited on a platinum electrode.                     | S15 |
| <b>Figure S18:</b> UV visible spectroscopy of neutral, slightly <i>p</i> -doped and highly <i>p</i> -doped <b>poly(BBTSBS)</b> electrogenerated by anodic oxidation of <b>BBTSBS</b> on an ITO glass electrode. | S16 |
| <b>References</b>                                                                                                                                                                                               | S17 |

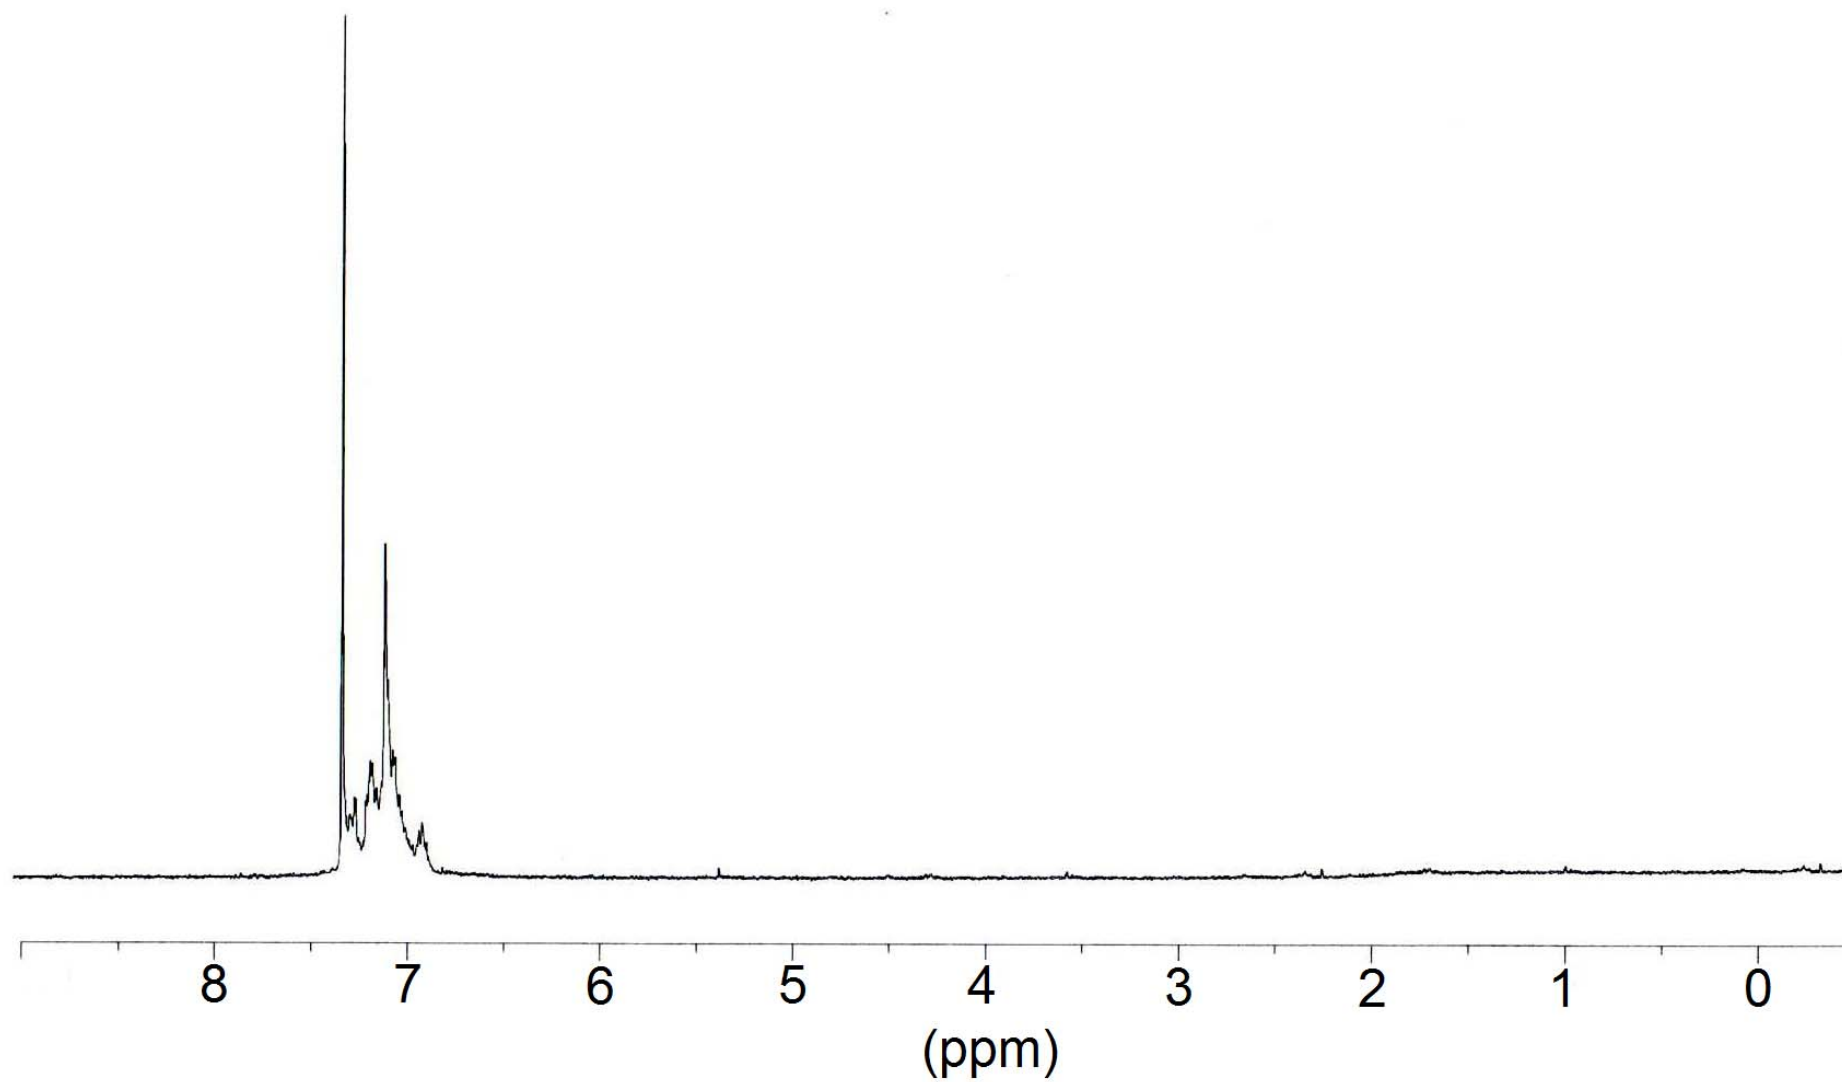

**Figure S1.** <sup>1</sup>H NMR spectrum of **DTSBS** in CDCl<sub>3</sub>.

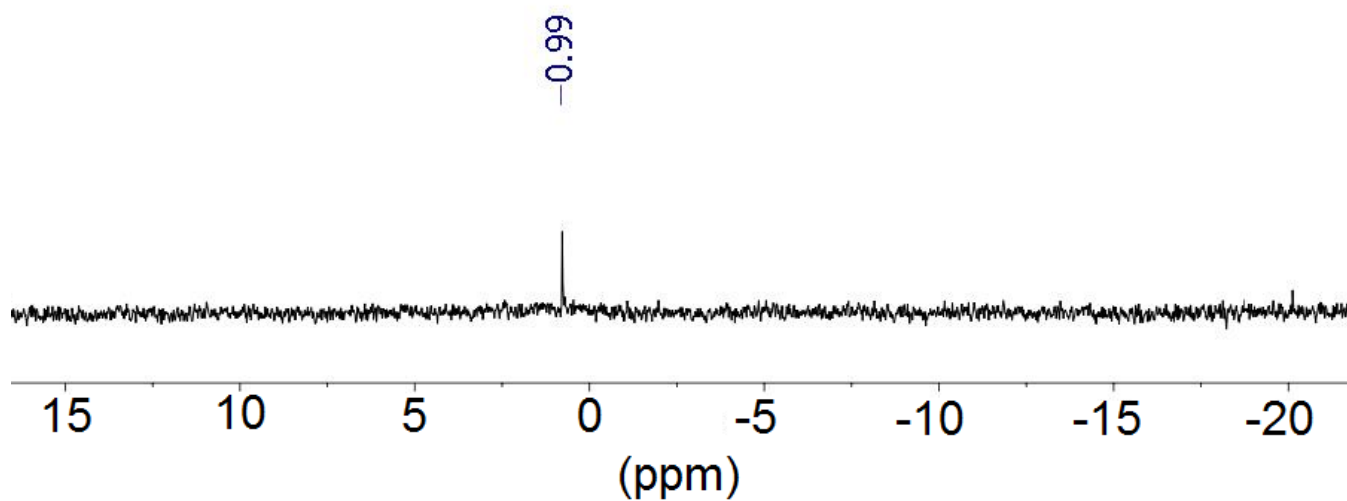

**Figure S2.**  $^{29}\text{Si}\{^1\text{H}\}$  NMR spectrum of **DTSBS** in  $\text{CDCl}_3$ .

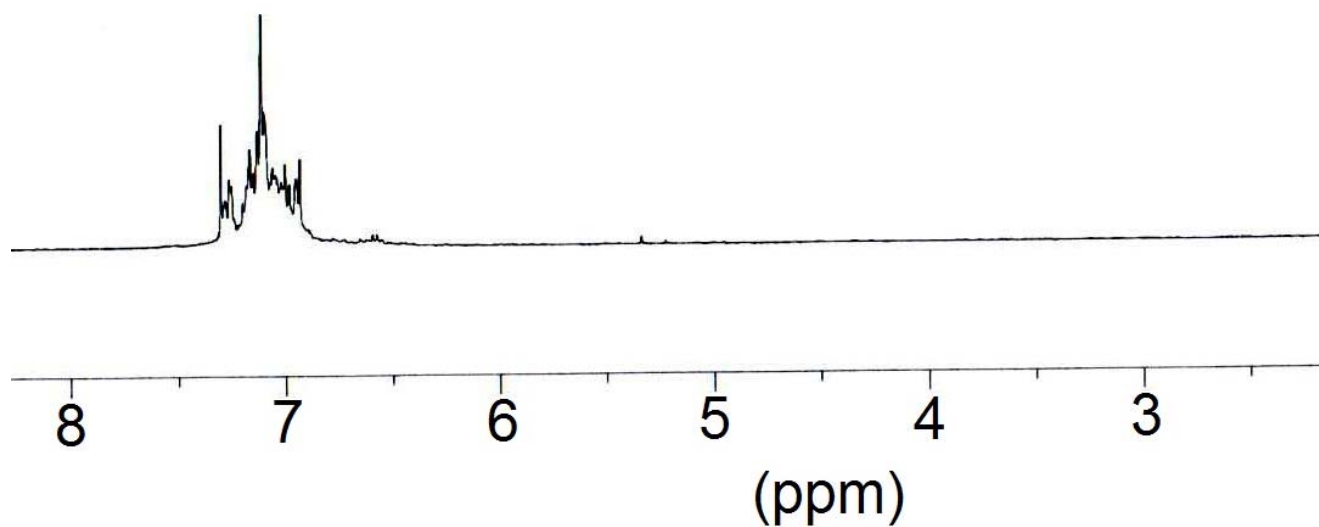

**Figure S3.**  $^1\text{H}$  NMR spectrum of **BBTsBS** in  $\text{CDCl}_3$ .

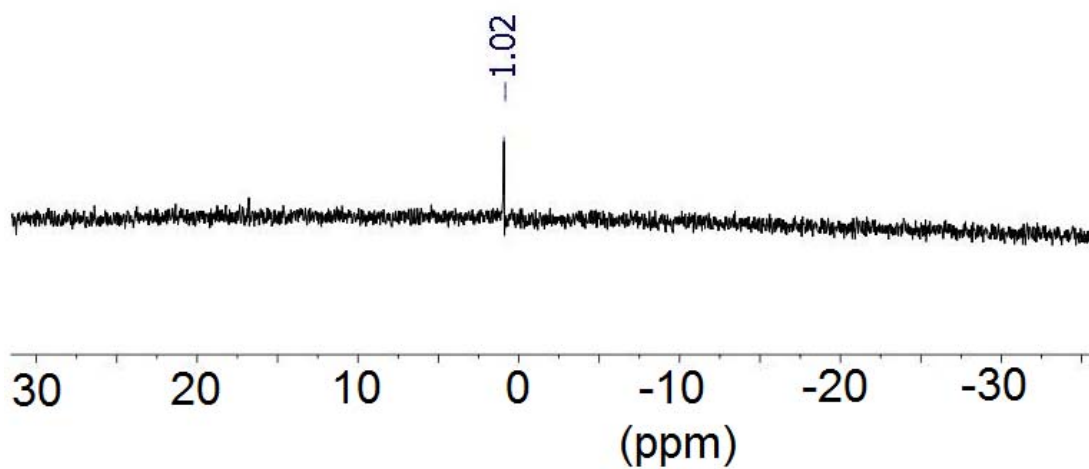

**Figure S4.**  $^{29}\text{Si}\{^1\text{H}\}$  NMR spectrum of **BTSBS** in  $\text{CDCl}_3$ .

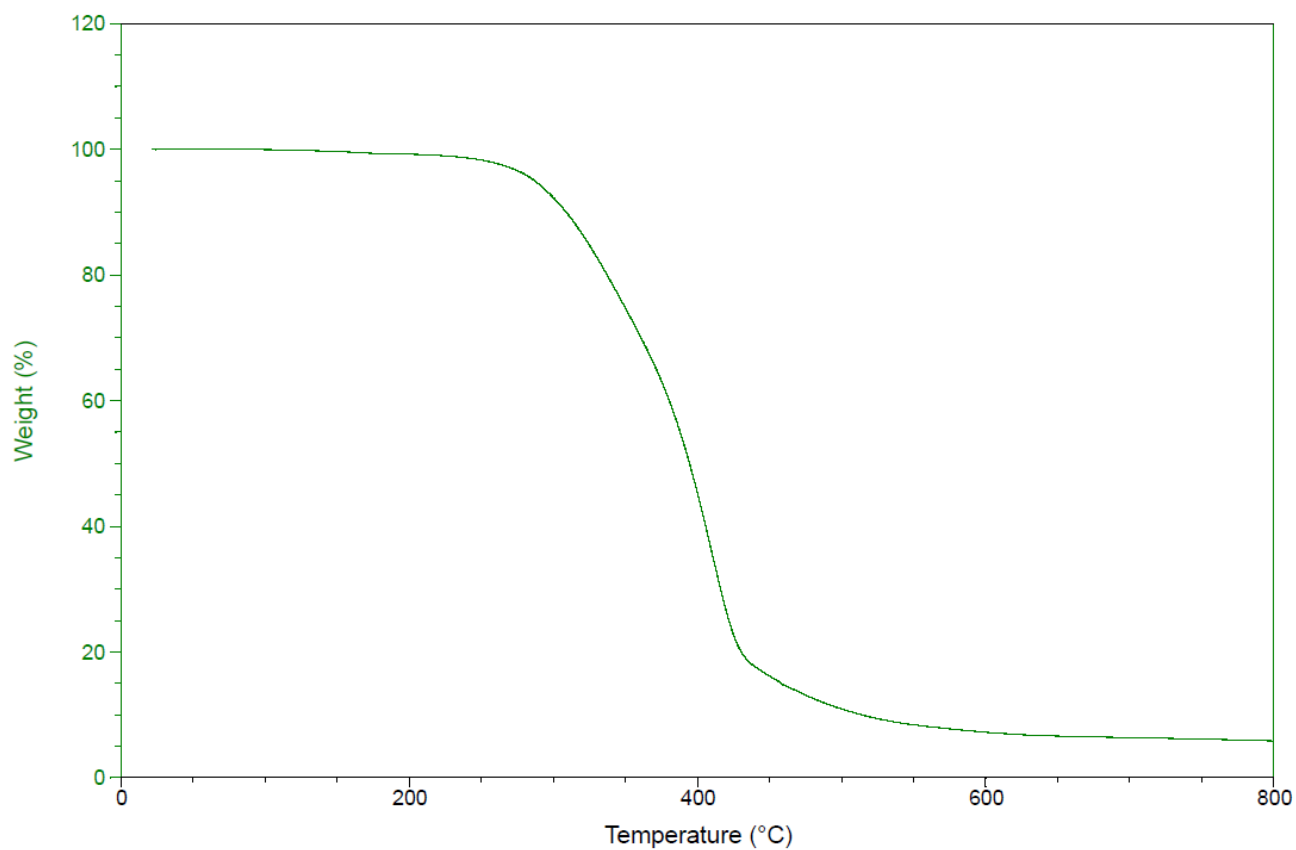

**Figure S5.** TGA trace for **DTSBS**.

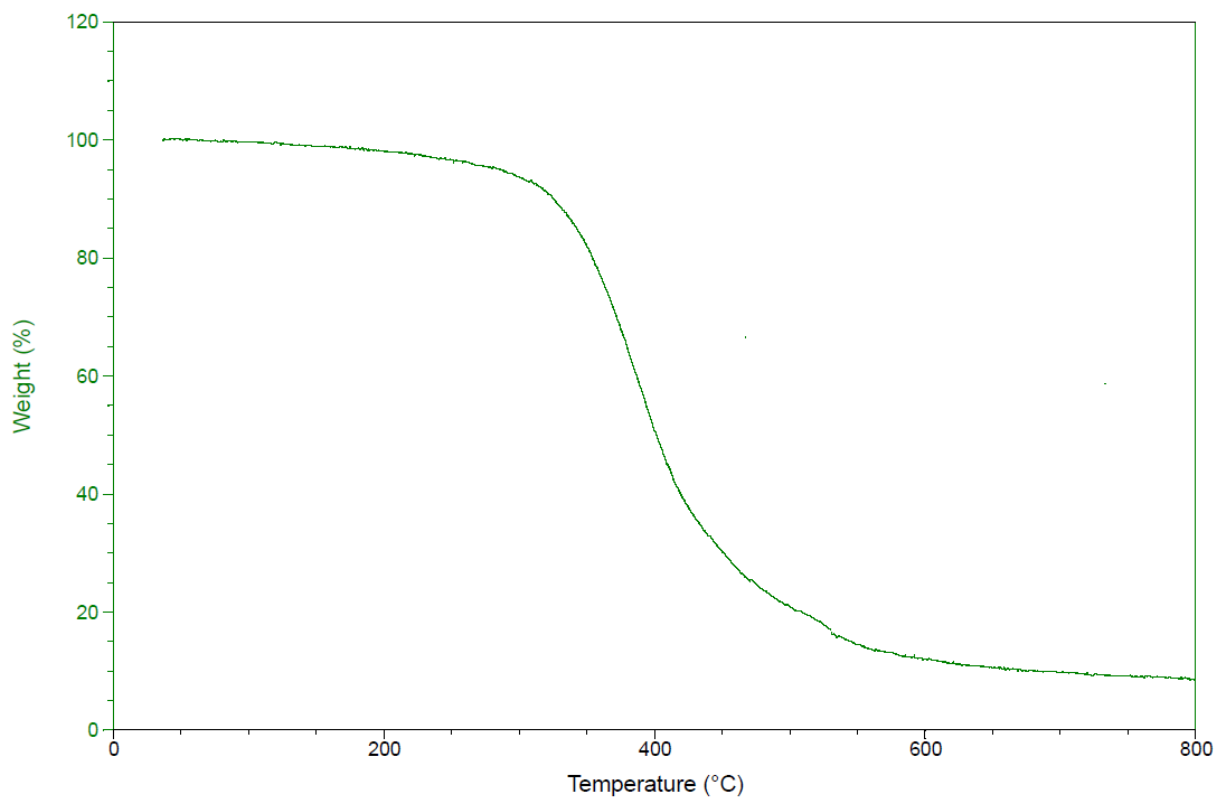

**Figure S6.** TGA trace for **BBTSBS**.

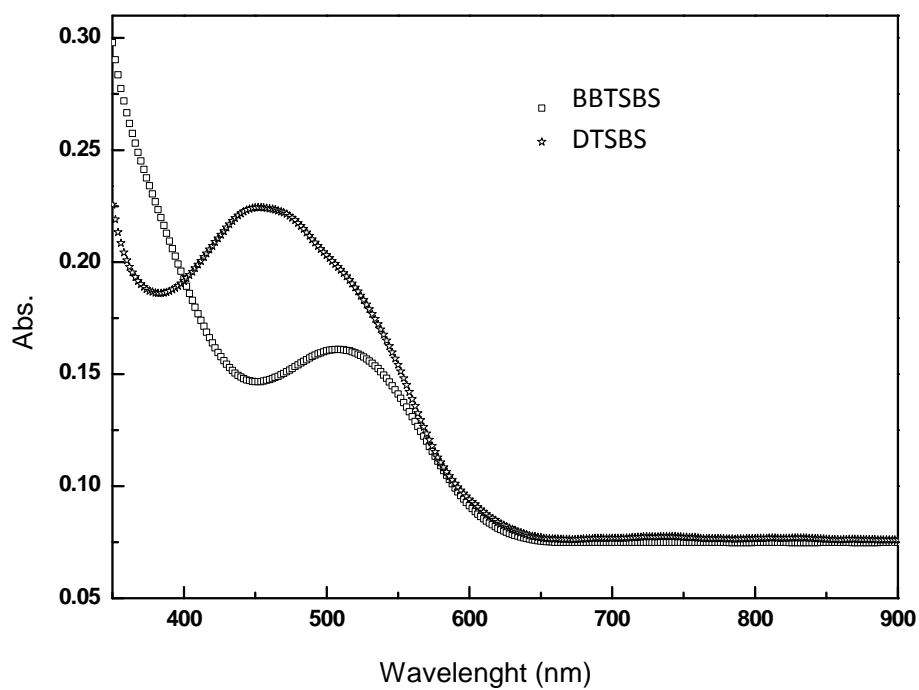

**Figure S7.** Absorption of **BBTSBS** and **DTSBS** in thin film.

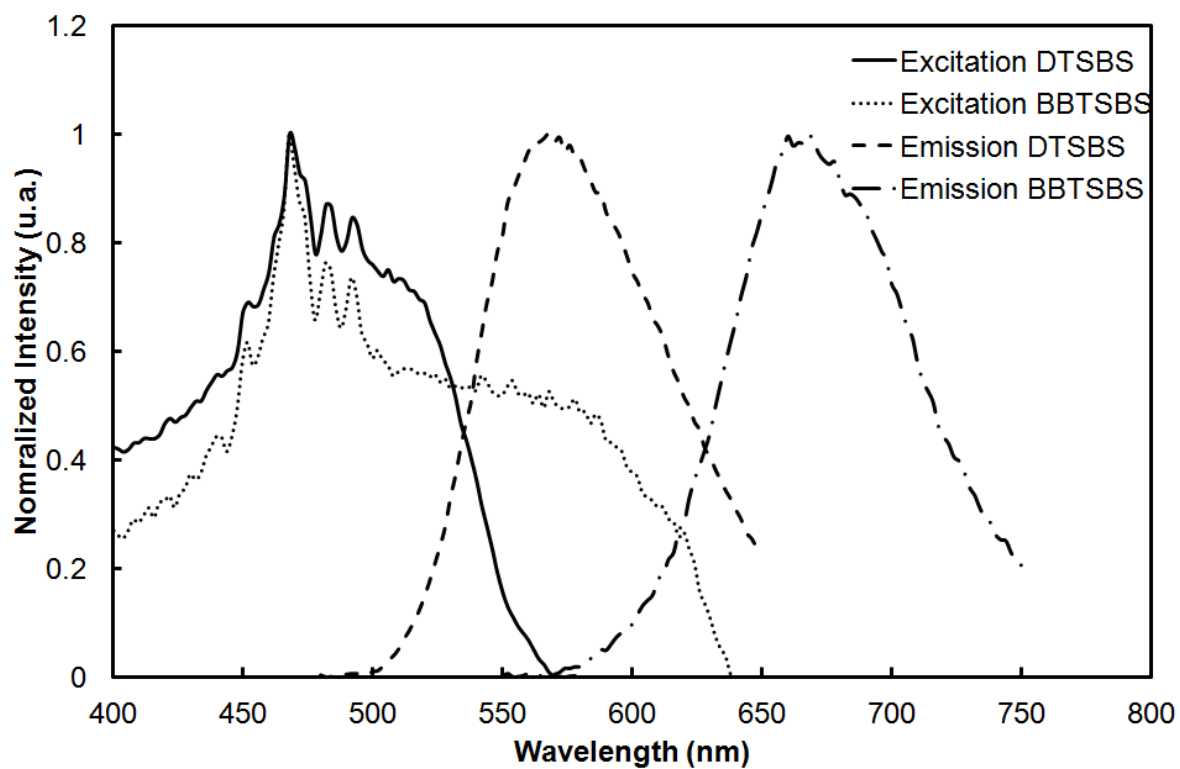

**Figure S8.** Excitation and emission spectra in the solid state for **DTSBS** and **BBTSBS**.

## Calculations :

The geometries were optimized by DFT calculations at the UB3LYP/6-31G level of theory. Energies were calculated at the UB3LYP/6-31G\* level of theory. All calculations were carried-out with the Gaussian 03 program package.<sup>1</sup>

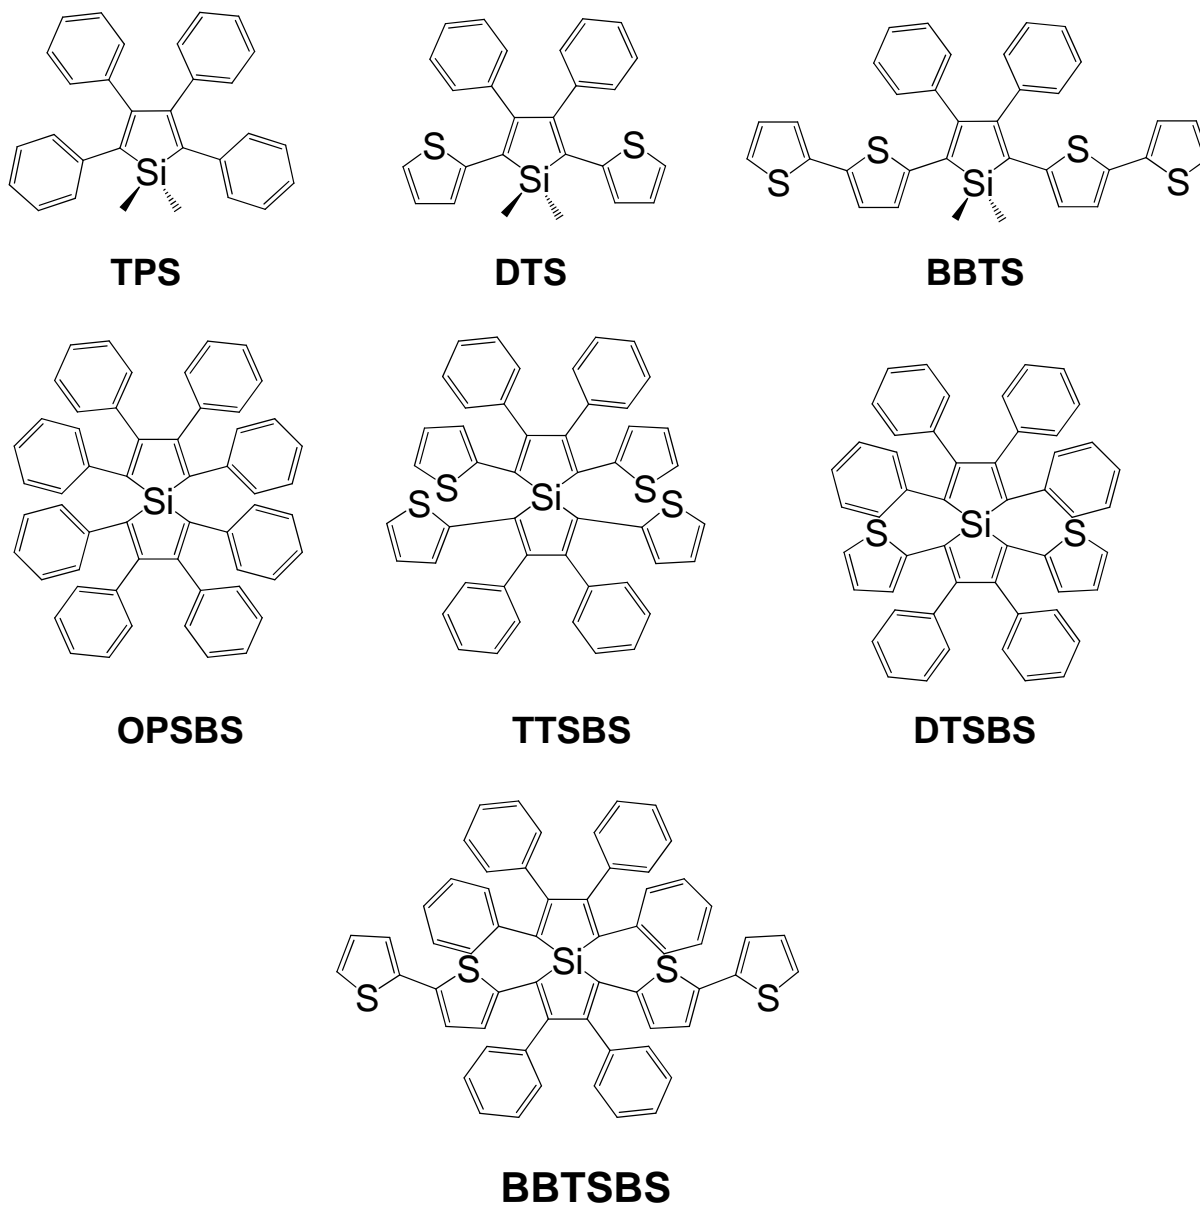

**Figure S9.** Structure of the siloles and spiro-siloles studied herein.



|        | HOMO-2                                                                              | HOMO-1                                                                              | HOMO                                                                                | LUMO                                                                                 | LUMO+1                                                                                | LUMO+2                                                                                |
|--------|-------------------------------------------------------------------------------------|-------------------------------------------------------------------------------------|-------------------------------------------------------------------------------------|--------------------------------------------------------------------------------------|---------------------------------------------------------------------------------------|---------------------------------------------------------------------------------------|
| TPS    | 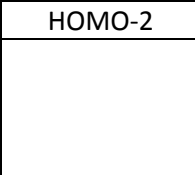   |    |    |    |    |                                                                                       |
|        |                                                                                     | -6.33 eV                                                                            | -5.53 eV                                                                            | -1.87 eV                                                                             | -0.64 eV                                                                              |                                                                                       |
| DTS    |    |    |    |    |    |                                                                                       |
|        |                                                                                     | -6.47 eV                                                                            | -5.17 eV                                                                            | -2.18 eV                                                                             | -0.78 eV                                                                              |                                                                                       |
| BBTS   |    |    |    |    |    |                                                                                       |
|        |                                                                                     | -5.84 eV                                                                            | -4.93 eV                                                                            | -2.54 eV                                                                             | -1.65 eV                                                                              |                                                                                       |
| OPSBS  |   |   |   |   |   |   |
|        | -6.66 eV                                                                            | -5.64 eV                                                                            | -5.49 eV                                                                            | -2.05 eV                                                                             | -2.01 eV                                                                              | -0.61 eV                                                                              |
| TTSBS  |  |  |  |  |  |  |
|        | -6.54 eV                                                                            | -5.32 eV                                                                            | -5.22 eV                                                                            | -2.41 eV                                                                             | -2.32 eV                                                                              | -0.87 eV                                                                              |
| DTSBS  |  |  |  |  |  |  |
|        | -6.43 eV                                                                            | -5.69 eV                                                                            | -5.21 eV                                                                            | -2.31 eV                                                                             | -2.13 eV                                                                              | -0.82 eV                                                                              |
| BBTSBS |  |  |  |  |  |  |
|        | -5.82 eV                                                                            | -5.69 eV                                                                            | -4.94 eV                                                                            | -2.61 eV                                                                             | -2.17 eV                                                                              | -1.65 eV                                                                              |

**Figure S10.** Kohn-Sham frontier orbitals and corresponding energies of the siloles and spirobisiloles.

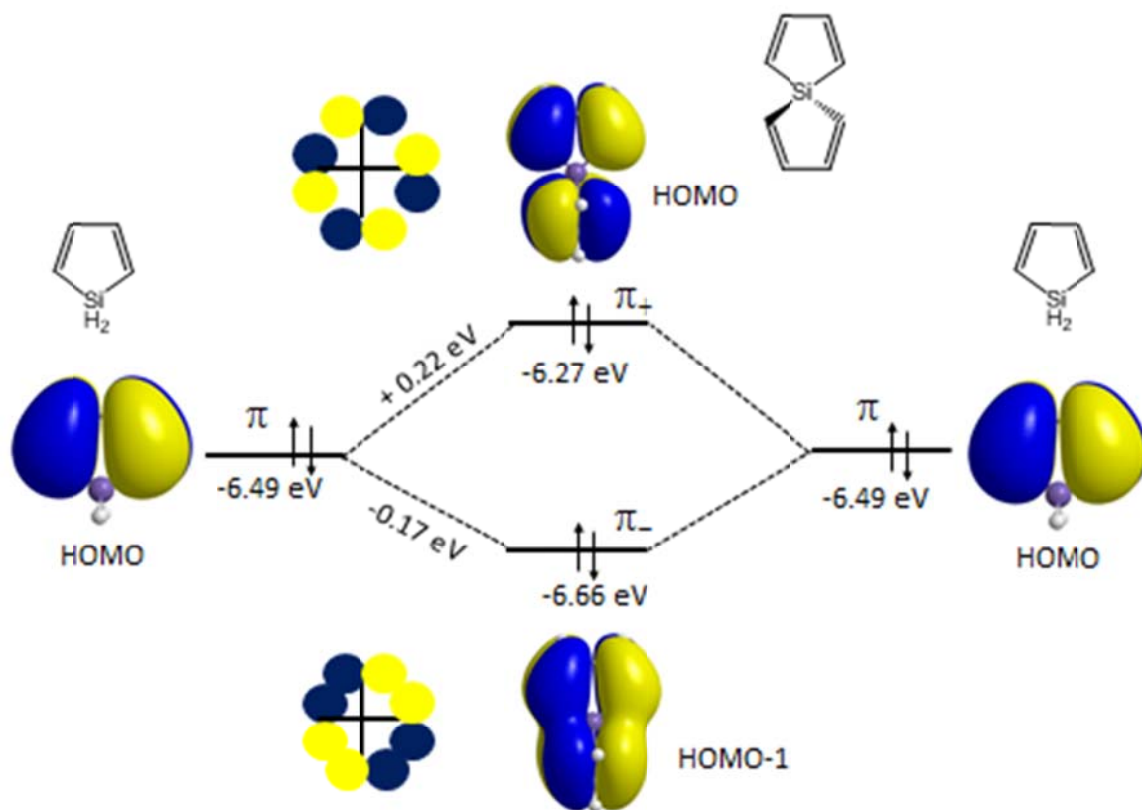

**Figure S11.** Illustration of the HOMO-HOMO interaction of two spirolinked bisilole rings exhibiting spiroconjugation.

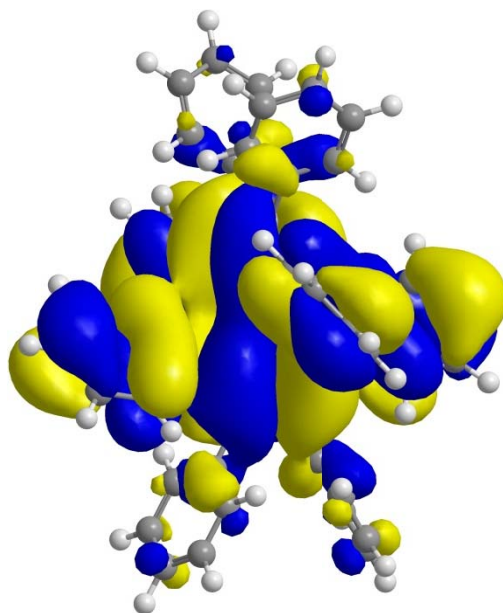

**Figure S12.** HOMO-1 Kohn-Sham orbital of OPSBS showing the overlap of the two  $\pi$  orbitals on the silole moieties giving rise to spiroconjugation.

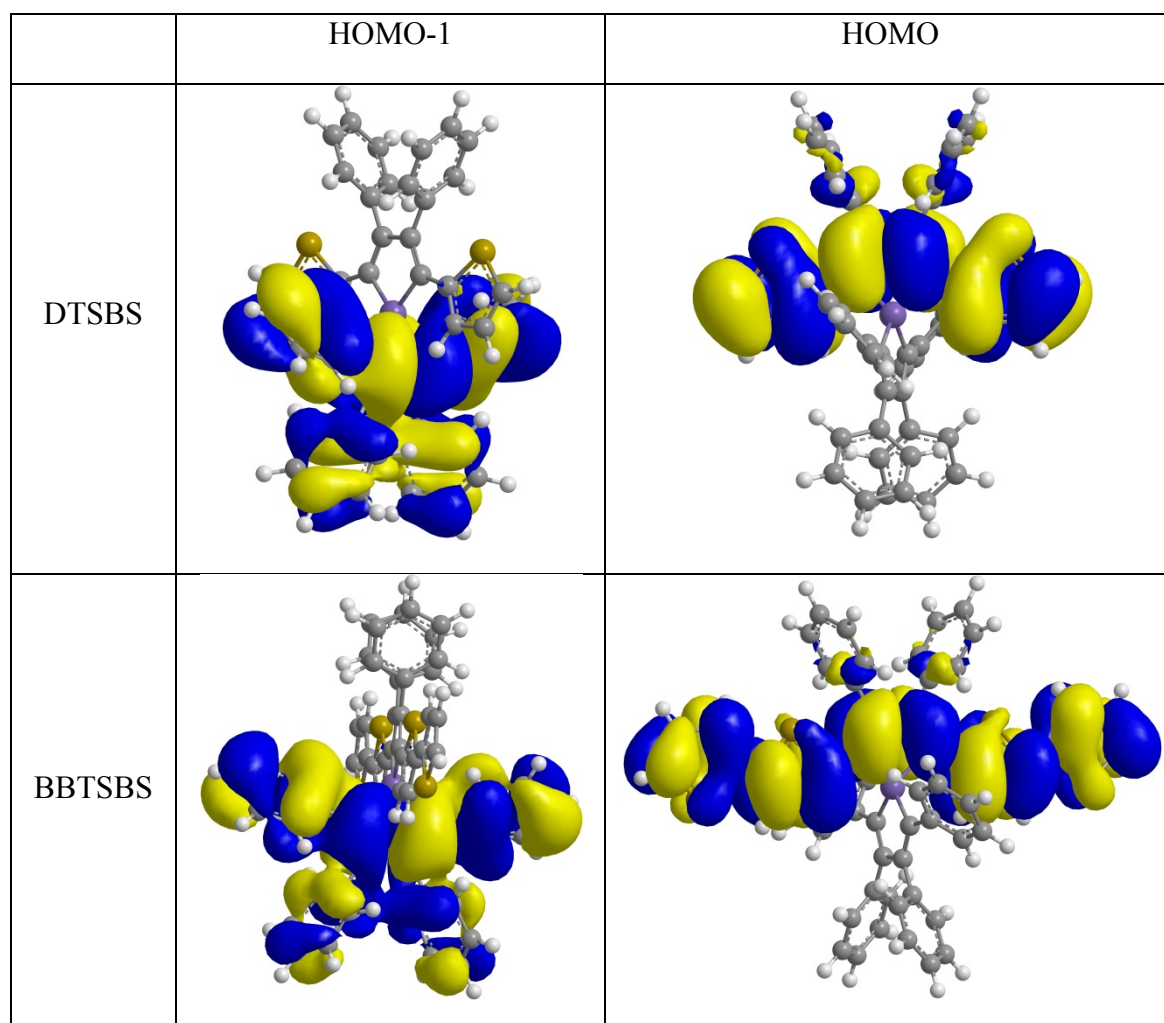

**Figure S13.** Views of Kohn-Sham HOMO-1 and HOMO of DTSBS and BBTSBS.

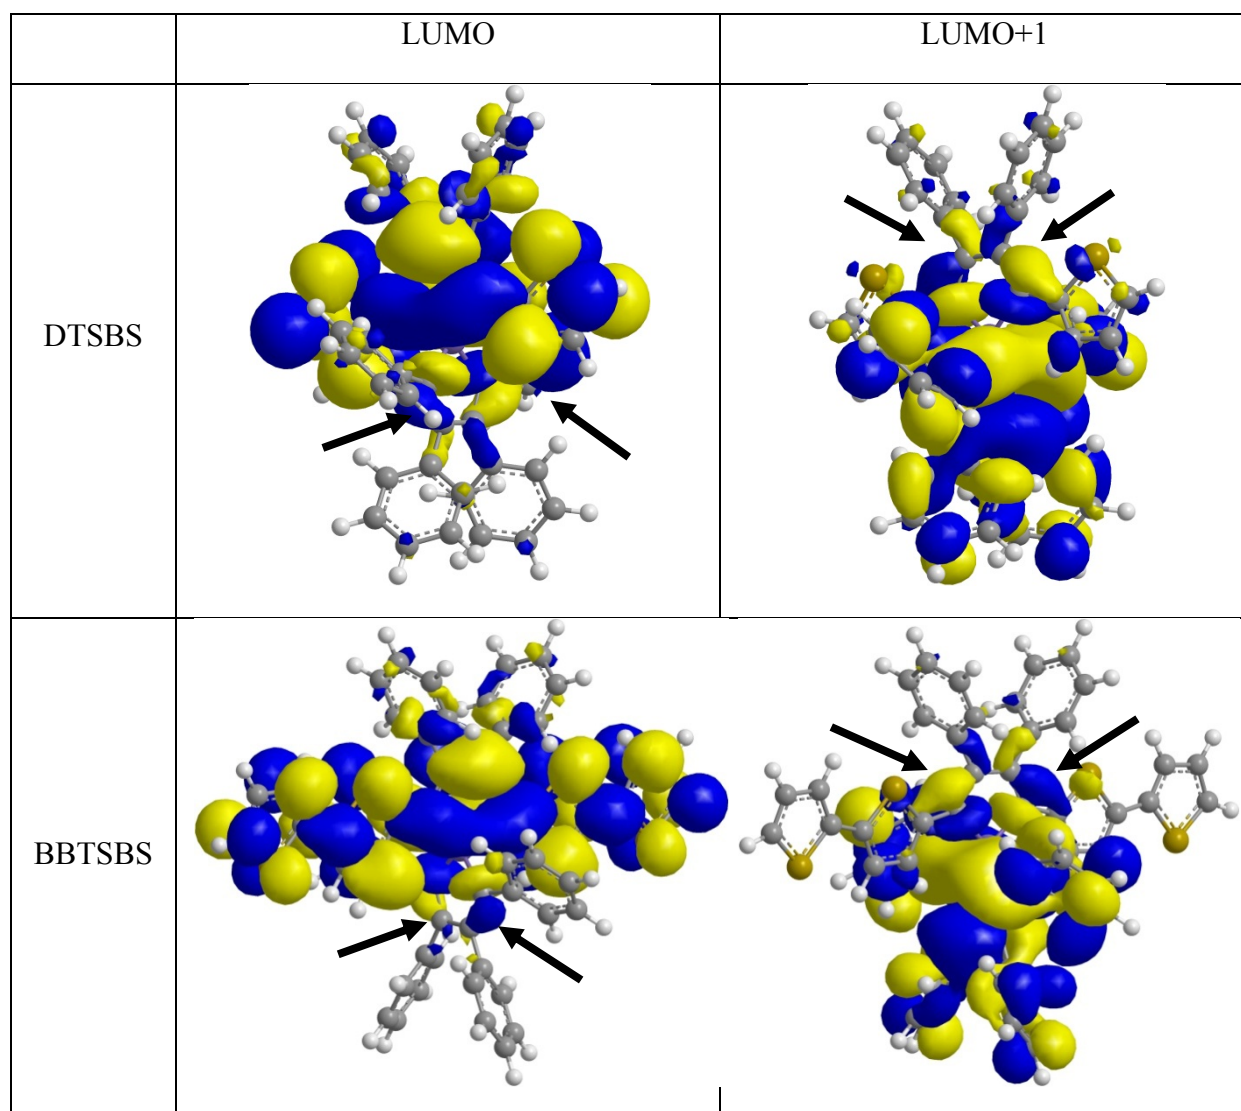

**Figure S14.** Views of Kohn-Sham LUMO and LUMO+1 of DTSBS and BBTSBS. The arrows indicate the location of the  $\sigma^*$  orbitals involved in the  $\sigma^*$ - $\pi^*$  hyperconjugation.

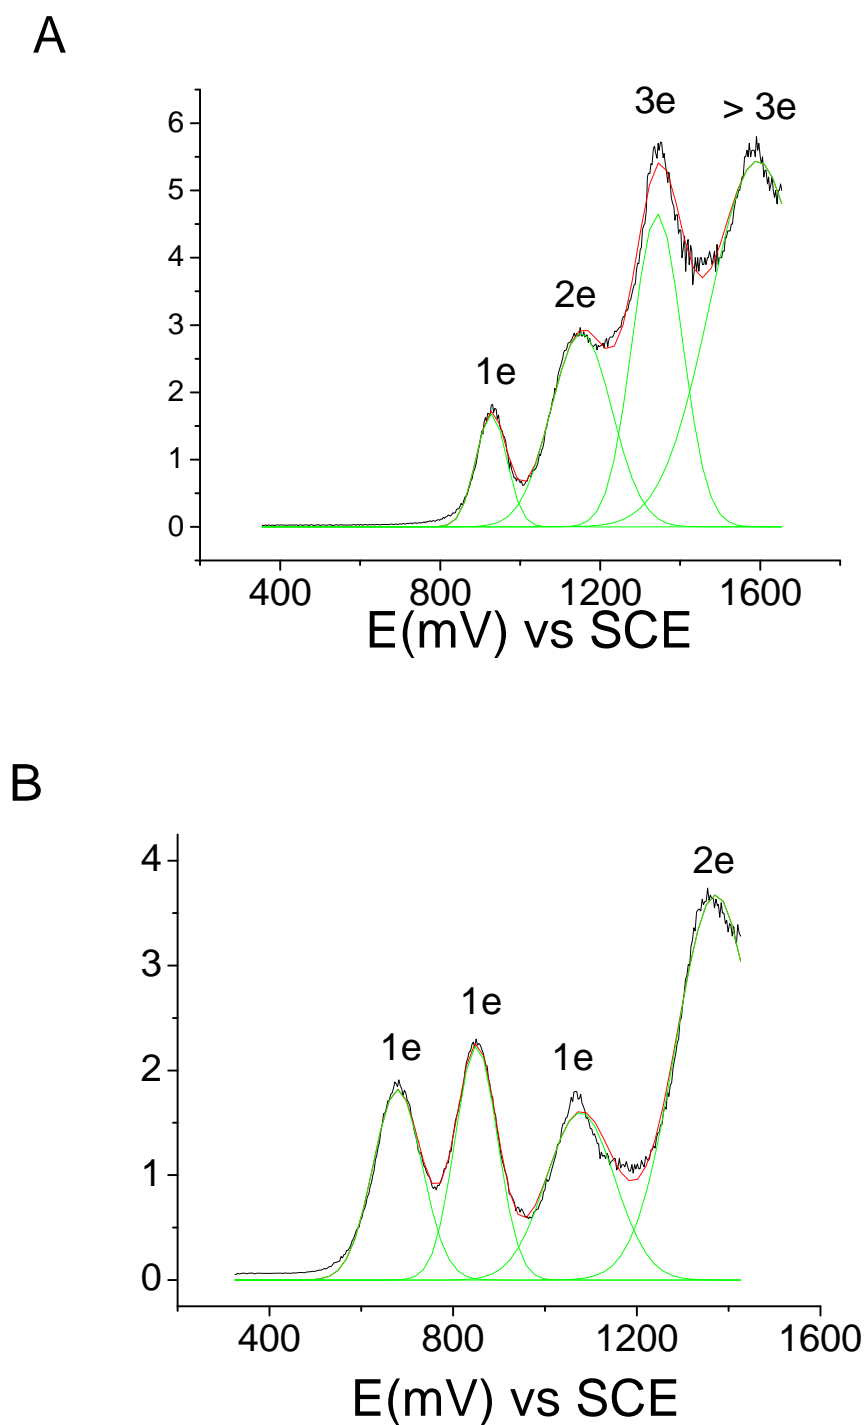

**Figure S15.** In black : Experimental DPV recorded in  $\text{CH}_2\text{Cl}_2$ - $[\text{NBu}_4][\text{PF}_6]$  0.2 M, in the presence of **DTSBS** ( $9.8 \cdot 10^{-3}$  M) in A and of **BBTBSBS** ( $3.2 \cdot 10^{-3}$  M) in B. In red: fit of the experimental data with the sum of four individual Gaussian peaks depicted in green.

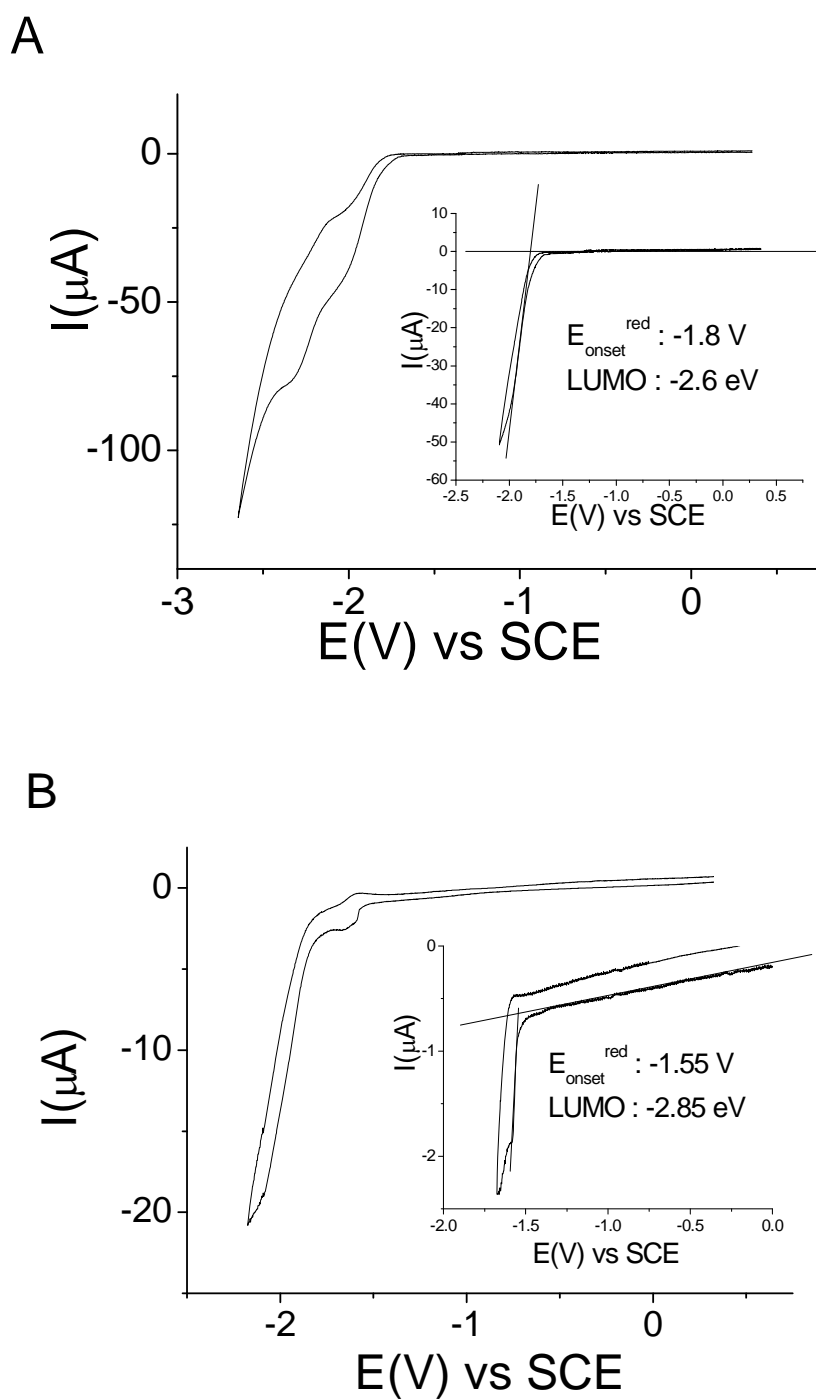

**Figure S16.** Cyclic voltammetry in  $\text{CH}_2\text{Cl}_2$ -[NBu<sub>4</sub>][PF<sub>6</sub>] 0.2 M. in the presence of **DTSBS** ( $9.8 \times 10^{-3}$  M) in A and of **BBTSBS** ( $3.2 \times 10^{-3}$  M) in B. One cycle between 0.35 and -2.35 V in A and 0.33 and -2.17 V in B. Insets in A and B: zoom on the first reduction wave and  $E_{\text{onset}}^{\text{red}}$  and LUMO determination. Working electrode: 1 mm diameter Pt disk, Sweep-rate : 100 mV/s.

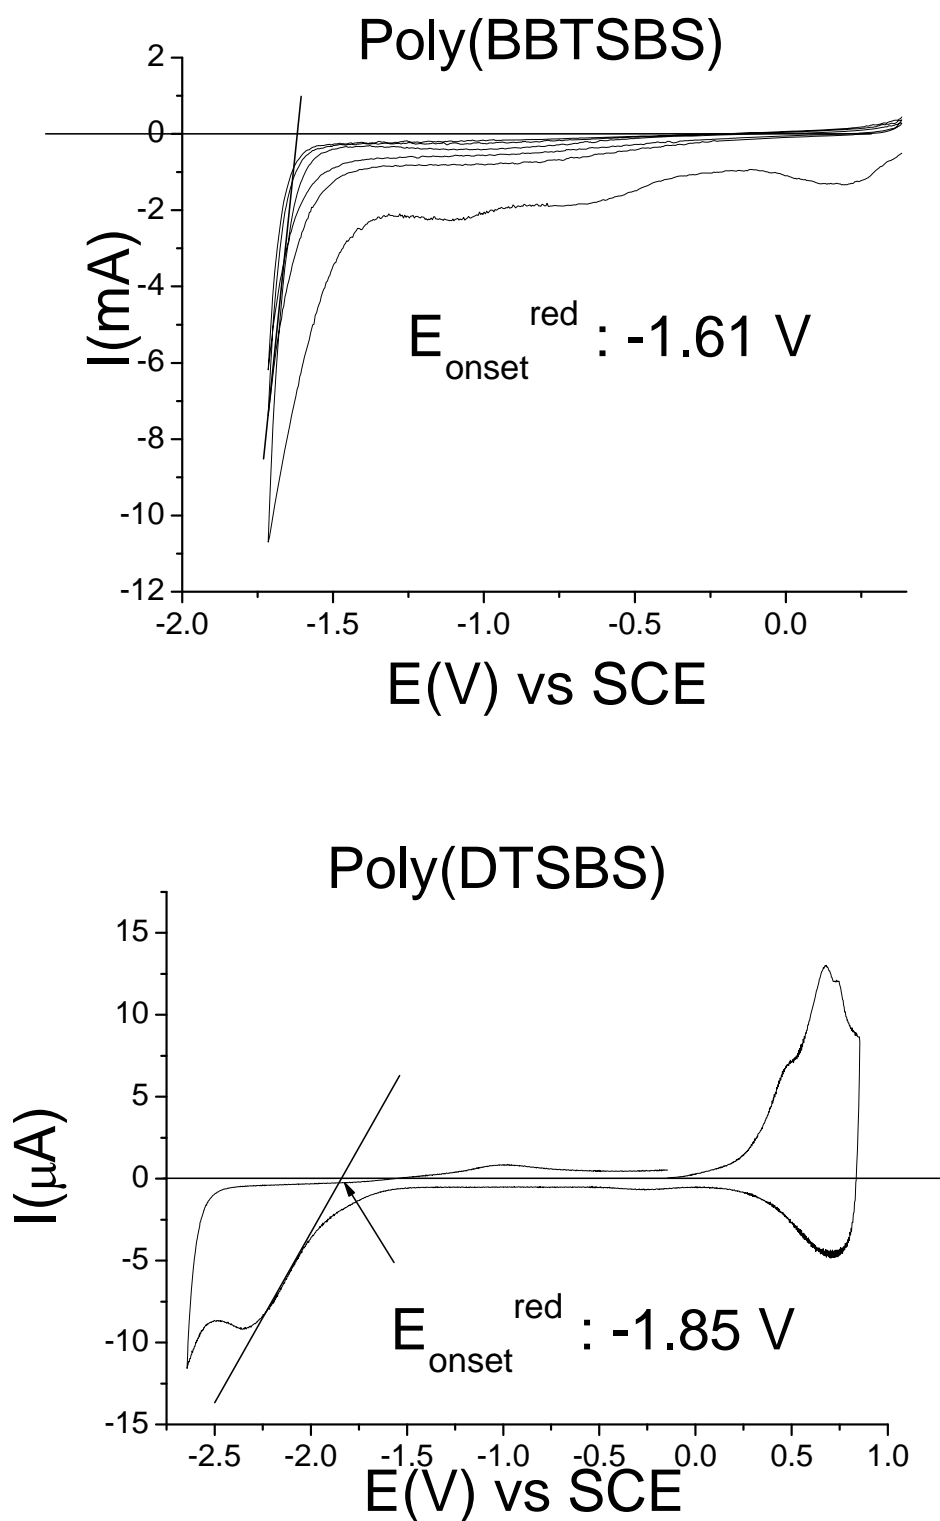

**Figure S17.** Cyclic voltammetry in  $\text{CH}_2\text{Cl}_2$ - $[\text{NBu}_4][\text{PF}_6]$  0.2 M. of a working electrode (1 mm diameter, Pt disk) modified by a deposit of **poly(BBTSBS)** and of **poly(DTSBS)**. Sweep-rate : 100 mV/s.

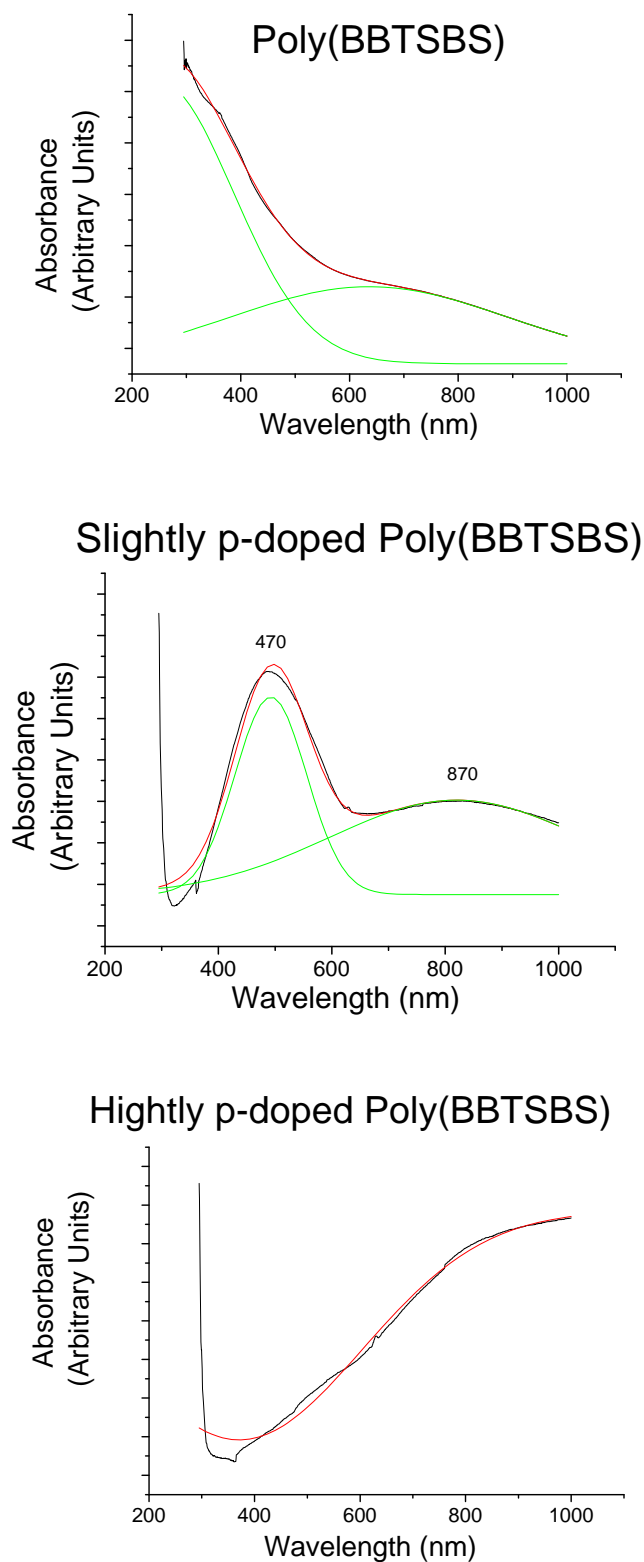

**Figure S18.** UV visible spectroscopy of neutral, slightly *p*-doped and highly *p*-doped **poly(BBTsBS)** electrogenerated by anodic oxidation of **BBTsBS** on an ITO glass electrode.



## References.

- <sup>1.</sup> Gaussian 03, Revision D.02, M. J. Frisch, G. W. Trucks, H. B. Schlegel, G. E. Scuseria, M. A. Robb, J. R. Cheeseman, J. A. Montgomery, Jr., T. Vreven, K. N. Kudin, J. C. Burant, J. M. Millam, S. S. Iyengar, J. Tomasi, V. Barone, B. Mennucci, M. Cossi, G. Scalmani, N. Rega, G. A. Petersson, H. Nakatsuji, M. Hada, M. Ehara, K. Toyota, R. Fukuda, J. Hasegawa, M. Ishida, T. Nakajima, Y. Honda, O. Kitao, H. Nakai, M. Klene, X. Li, J. E. Knox, H. P. Hratchian, J. B. Cross, V. Bakken, C. Adamo, J. Jaramillo, R. Gomperts, R. E. Stratmann, O. Yazyev, A. J. Austin, R. Cammi, C. Pomelli, J. W. Ochterski, P. Y. Ayala, K. Morokuma, G. A. Voth, P. Salvador, J. J. Dannenberg, V. G. Zakrzewski, S. Dapprich, A. D. Daniels, M. C. Strain, O. Farkas, D. K. Malick, A. D. Rabuck, K. Raghavachari, J. B. Foresman, J. V. Ortiz, Q. Cui, A. G. Baboul, S. Clifford, J. Cioslowski, B. B. Stefanov, G. Liu, A. Liashenko, P. Piskorz, I. Komaromi, R. L. Martin, D. J. Fox, T. Keith, M. A. Al-Laham, C. Y. Peng, A. Nanayakkara, M. Challacombe, P. M. W. Gill, B. Johnson, W. Chen, M. W. Wong, C. Gonzalez, J. A. Pople, Gaussian, Inc., Wallingford CT, 2004.
